# Supplementary material
Source: PubMed Central journal article supplement (PMC6520040)
Supplement: nmy103_supplemental_file.pdf [file nmy103_supplemental_file.pdf]

**Supplemental Table 1:** Example of the search strategy

((((((((((((((((((((((((((((((((((((((("immunoglobulins"[MeSH Terms]) OR Immunoglobulin\*) OR IgE) OR IgD) OR IgM) OR IgA) OR IgG) OR Platelet[MeSH Terms]) OR Platelet\*) OR Basophil[MeSH Terms]) OR Basophil\*) OR Eosinophil[MeSH Terms]) OR Eosinophil\*) OR "t lymphocyte subsets"[MeSH Terms]) OR t cell\*) OR "b lymphocyte subsets"[MeSH Terms]) OR B cell\*) OR Monocyte[MeSH Terms]) OR Monocyte\*) OR Neutrophil[MeSH Terms]) OR Neutrophil\*) OR Leukocyte[MeSH Terms]) OR Lymphocyte\*) OR Lymphocyte\*[MeSH Terms]) OR Leukocyte\*) OR white blood cells) OR "white blood cells") OR white blood cell) OR "white blood cell") OR NK) OR "natural killer t cells"[MeSH Terms]) OR "natural killer cells") OR natural killer cells) OR natural killer cell) OR "natural killer cell") OR "immunity"[MeSH Terms]) OR immune)) OR (((tumor necrosis factor[MeSH Terms]) OR interleukin[MeSH Terms]) OR (((((((((((((((((((("fibrinogen"[MeSH Terms]) OR fibrinogen) OR TNF) OR "tumor necrosis factor alpha"[MeSH Terms]) OR tumour necrosis factor) OR "tumour necrosis factor") OR "tumor necrosis factor") OR IL-6) OR interleukin) OR "interleukin") OR CRP) OR "c reactive protein") OR C-Reactive Protein[MeSH Terms]) OR inflammat\*) OR "inflammation"[MeSH Terms]))) AND ((((((("plant based") OR "plant-based") OR vegan\*) OR "vegans"[MeSH Terms]) OR \*vegetarian) OR vegetarian\*) OR vegetarian[MeSH Terms])

Supplementary Data

**Supplemental Table 2.** Modified Newcastle Ottawa Scale assessing of the quality of studies

|                                                                                                                                                                                                                                                                                                                                                                                                       | Acosta-Navarro et al (42), Navarro et al. (48) <sup>1</sup> | Justification     | Ambroszkiewicz et al. (43) | Justification                              | Chen et al. (45) | Justification                                                                        | Chen et al. (44) | Justification                        | Chuang et al. (46) | Justification                                                                                                                          | Dong and Scott (47) | Justification                                                     |
|-------------------------------------------------------------------------------------------------------------------------------------------------------------------------------------------------------------------------------------------------------------------------------------------------------------------------------------------------------------------------------------------------------|-------------------------------------------------------------|-------------------|----------------------------|--------------------------------------------|------------------|--------------------------------------------------------------------------------------|------------------|--------------------------------------|--------------------|----------------------------------------------------------------------------------------------------------------------------------------|---------------------|-------------------------------------------------------------------|
| <b>Sample selection criteria</b><br><b>Selection:</b> (Maximum 3 stars)                                                                                                                                                                                                                                                                                                                               |                                                             |                   |                            |                                            |                  |                                                                                      |                  |                                      |                    |                                                                                                                                        |                     |                                                                   |
| <i>1) Representativeness of the sample:</i><br>a) Truly representative of the average in the target population. ★<br>(all subjects or random sampling)<br>b) Somewhat representative of the average in the target population. ★<br>(non-random sampling)<br>c) Selected group of users.<br>d) No description of the sampling strategy.                                                                | 1b ★                                                        | small sample size | 1b ★                       | children aged 4.5-9                        | 1b ★             | All pts undergoing general health examination, but enrolled first come, first served | 1b ★             | females only                         | 1b ★               | large sample based on health records of pts in clinics, but not clear how vegetarian and non-vegetarian cases/controls were identified | 1c                  | pts of a vegetarian society conference + very small non-veg group |
| <i>2) Non-respondents:</i><br>a) Comparability between respondents and non-respondents characteristics is established, and the response rate is satisfactory. ★<br>b) The response rate is unsatisfactory, or the comparability between respondents and non-respondents is unsatisfactory.<br>c) No description of the response rate or the characteristics of the responders and the non-responders. | 2a ★                                                        | -                 | 2c                         | no description of those not enrolled       | 2c               | no description of those not enrolled                                                 | 2c               | no description of those not enrolled | 2c                 | no description of those not enrolled                                                                                                   | 2c                  | no description of those not enrolled                              |
| <i>3) Ascertainment of the exposure (risk factor):</i><br>a) Validated measurement tool. ★<br>b) Non-validated measurement tool, but the tool is available or described.<br>c) No description of the measurement tool.<br>NOTE - Study must say 'validated' to score star                                                                                                                             | 3b                                                          | -                 | 3b                         | tool described, but not clear if validated | 3c               | No description - general diet only                                                   | 3c               | No description of questionnaire used | 3a ★               | validated tool                                                                                                                         | 3b                  | tool described, but not clear if validated                        |

Supplementary Data

**Supplemental Table 2.** Modified Newcastle Ottawa Scale assessing of the quality of studies - Continued

|                                                                                                                                                                                                                                                                                                                                                                                                                                                                                                                                                                                                  |              |                                                   |              |                                                                              |              |                             |              |                                                                                              |              |                                                                                                                         |            |                                           |
|--------------------------------------------------------------------------------------------------------------------------------------------------------------------------------------------------------------------------------------------------------------------------------------------------------------------------------------------------------------------------------------------------------------------------------------------------------------------------------------------------------------------------------------------------------------------------------------------------|--------------|---------------------------------------------------|--------------|------------------------------------------------------------------------------|--------------|-----------------------------|--------------|----------------------------------------------------------------------------------------------|--------------|-------------------------------------------------------------------------------------------------------------------------|------------|-------------------------------------------|
| <p><b>Comparability:</b> (Maximum 2 stars)<br/> <i>1) The subjects in different outcome groups are comparable, based on the study design or analysis. Confounding factors are controlled.</i><br/>                 a) The study controls for the most important factor (BMI). ★<br/>                 b) The study controls for any additional factors. ★ (Smoking and physical activity)<br/>                 Note: for ★ on 1b - both PA and smoking needs to be controlled</p>                                                                                                                 | 1b ★         | ANOVA analysis performed due to differences in PA | 1a ★         | PA not considered<br>BMI similar between groups, other factors not discussed | 1a ★         | Sig. differences in smoking | 1a ★<br>1b ★ | Did not statistically adjust, but exclusion criteria would have limited confounders somewhat | 1b ★         | Did not adjust for BMI (differed significantly between groups), but did adjust for age, sex, PA, alcohol and study site | -          | Does not appear to adjust for confounders |
| <p><b>Outcome:</b> (Maximum 2 stars)</p>                                                                                                                                                                                                                                                                                                                                                                                                                                                                                                                                                         |              |                                                   |              |                                                                              |              |                             |              |                                                                                              |              |                                                                                                                         |            |                                           |
| <p><i>1) Assessment of the outcome:</i><br/>                 a) Independent blind assessment. ★<br/>                 b) Record linkage. ★<br/>                 c) Self report.<br/>                 d) No description.<br/> <i>2) Statistical test:</i><br/>                 a) The statistical test used to analyse the data is clearly described and appropriate, and the measurement of the association is presented, including confidence intervals and the probability level (p value). ★<br/>                 b) The statistical test is not appropriate, not described or incomplete.</p> | 1a ★<br>2a ★ | -                                                 | 1a ★<br>2a ★ | -                                                                            | 1a ★<br>2a ★ | -                           | 1a ★<br>2a ★ | -                                                                                            | 1a ★<br>2a ★ | -                                                                                                                       | 1a ★<br>2b | -                                         |
| <p><b>Total ★ (/7)<sup>2</sup></b></p>                                                                                                                                                                                                                                                                                                                                                                                                                                                                                                                                                           | 5            |                                                   | 4            |                                                                              | 4            |                             | 5            |                                                                                              | 5            |                                                                                                                         | 1          |                                           |

**Supplemental Table 2.** Modified Newcastle Ottawa Scale assessing of the quality of studies - Continued

|                                                                                                                                                                                                                                                                                                                                                                                                       | Famodu et al. (49) | Justification                                                                                                          | Fontana et al. (50) | Justification                                         | Fontana et al. (51) | Justification                                                      | Franco-de-Moraes et al. (52) | Justification                        | Gorczyca et al. (53) | Justification                                            | Haddad et al. (54) | Justification                               |
|-------------------------------------------------------------------------------------------------------------------------------------------------------------------------------------------------------------------------------------------------------------------------------------------------------------------------------------------------------------------------------------------------------|--------------------|------------------------------------------------------------------------------------------------------------------------|---------------------|-------------------------------------------------------|---------------------|--------------------------------------------------------------------|------------------------------|--------------------------------------|----------------------|----------------------------------------------------------|--------------------|---------------------------------------------|
| <b>Sample selection criteria</b><br><b>Selection:</b> (Maximum 3 stars)                                                                                                                                                                                                                                                                                                                               |                    |                                                                                                                        |                     |                                                       |                     |                                                                    |                              |                                      |                      |                                                          |                    |                                             |
| <i>1) Representativeness of the sample:</i><br>a) Truly representative of the average in the target population. ★ (all subjects or random sampling)<br>b) Somewhat representative of the average in the target population. ★ (non-random sampling)<br>c) Selected group of users.<br>d) No description of the sampling strategy.                                                                      | 1d                 | no description of sampling strategy (states members of Adventist Seminary Institute of West Africa.) + non-vegetarians | 1c                  | small select sample, not representative<br>raw vegans | 1c                  | small sample, not clear how controls recruited, not representative | 1b ★                         | convenience sample                   | 1c                   | parents of non-vegetarian children not randomly selected | 1c                 | small sample, unlikely to be representative |
| <i>2) Non-respondents:</i><br>a) Comparability between respondents and non-respondents characteristics is established, and the response rate is satisfactory. ★<br>b) The response rate is unsatisfactory, or the comparability between respondents and non-respondents is unsatisfactory.<br>c) No description of the response rate or the characteristics of the responders and the non-responders. | 2c                 | no description of those not enrolled                                                                                   | 2c                  | no description of those not enrolled                  | 2c                  | no description of those not enrolled                               | 2c                           | no description of those not enrolled | 2c                   | no description of those not enrolled                     | 2c                 | no description of those not enrolled        |
| <i>3) Ascertainment of the exposure (risk factor):</i><br>a) Validated measurement tool. ★<br>b) Non-validated measurement tool, but the tool is available or described.<br>c) No description of the measurement tool.<br>NOTE - Study must say 'validated' to score star                                                                                                                             | 3b                 | tool described in supporting reference, but not described if validated                                                 | 3b                  | WFR - but no mention of validating                    | 3b                  | WFR but no mention of validation                                   | 3c                           | -                                    | 3b                   | FR used but unsure if validated                          | 3b                 | FR (trained) but no mention of validation   |

Supplementary Data

**Supplemental Table 2.** Modified Newcastle Ottawa Scale assessing of the quality of studies - Continued

|                                                                                                                                                                                                                                                                                                                                                                                                                                                                                                                                                                                                  |              |                                                                                                              |              |                                                                                                                                       |              |                                                                                                                                       |              |                           |              |                                                                                                                         |              |                                                                |
|--------------------------------------------------------------------------------------------------------------------------------------------------------------------------------------------------------------------------------------------------------------------------------------------------------------------------------------------------------------------------------------------------------------------------------------------------------------------------------------------------------------------------------------------------------------------------------------------------|--------------|--------------------------------------------------------------------------------------------------------------|--------------|---------------------------------------------------------------------------------------------------------------------------------------|--------------|---------------------------------------------------------------------------------------------------------------------------------------|--------------|---------------------------|--------------|-------------------------------------------------------------------------------------------------------------------------|--------------|----------------------------------------------------------------|
| <p><b>Comparability: (Maximum 2 stars)</b><br/> <i>1) The subjects in different outcome groups are comparable, based on the study design or analysis. Confounding factors are controlled.</i><br/>                 a) The study controls for the most important factor (BMI). ★<br/>                 b) The study controls for any additional factors. ★ (Smoking and physical activity)<br/>                 Note: for ★ on 1b - both PA and smoking needs to be controlled</p>                                                                                                                 | 1a ★         | did not adjust for confounders, although no difference in BMI.<br><br>No description of smoking status or PA | -            | Did not adjust for confounders (differences in BMI)<br><br>smoking same between groups however no description of PA between Ve and NV | -            | Did not adjust for confounders (differences in BMI)<br><br>smoking same between groups however no description of PA between Ve and NV | Nil          | BMI and PA not controlled | 1a ★         | did not adjust for confounders, or control for PA or smoking.<br><br>Height and weight not sig different between groups | 1b ★         | BMI sig diff between groups.<br><br>PA and Smoking no sig diff |
| <p><b>Outcome: (Maximum 2 stars)</b></p>                                                                                                                                                                                                                                                                                                                                                                                                                                                                                                                                                         |              |                                                                                                              |              |                                                                                                                                       |              |                                                                                                                                       |              |                           |              |                                                                                                                         |              |                                                                |
| <p><i>1) Assessment of the outcome:</i><br/>                 a) Independent blind assessment. ★<br/>                 b) Record linkage. ★<br/>                 c) Self report.<br/>                 d) No description.<br/> <i>2) Statistical test:</i><br/>                 a) The statistical test used to analyse the data is clearly described and appropriate, and the measurement of the association is presented, including confidence intervals and the probability level (p value). ★<br/>                 b) The statistical test is not appropriate, not described or incomplete.</p> | 1a ★<br>2a ★ | -                                                                                                            | 1a ★<br>2a ★ | -                                                                                                                                     | 1a ★<br>2a ★ | -                                                                                                                                     | 1a ★<br>2a ★ | -                         | 1a ★<br>2a ★ | -                                                                                                                       | 1a ★<br>2a ★ | -                                                              |
| <p><b>Total ★ (/7)</b></p>                                                                                                                                                                                                                                                                                                                                                                                                                                                                                                                                                                       | 3            |                                                                                                              | 2            |                                                                                                                                       | 2            |                                                                                                                                       | 3            |                           | 3            |                                                                                                                         | 3            |                                                                |

Supplementary Data

**Supplemental Table 2.** Modified Newcastle Ottawa Scale assessing of the quality of studies - Continued

|                                                                                                                                                                                                                                                                                                                                                                                                       | Krajcovicova-Kudlackova et al. (55) | Justification                                                               | Malter et al. (56) | Justification                                                                                 | Mezzano et al. (57) | Justification                               | Montalcini et al. (58) | Justification                                             | Ou et al. (59) | Justification                                                                     | Paalani et al. (60) | Justification                        |
|-------------------------------------------------------------------------------------------------------------------------------------------------------------------------------------------------------------------------------------------------------------------------------------------------------------------------------------------------------------------------------------------------------|-------------------------------------|-----------------------------------------------------------------------------|--------------------|-----------------------------------------------------------------------------------------------|---------------------|---------------------------------------------|------------------------|-----------------------------------------------------------|----------------|-----------------------------------------------------------------------------------|---------------------|--------------------------------------|
| <b>Sample selection criteria</b><br><b>Selection: (Maximum 3 stars)</b>                                                                                                                                                                                                                                                                                                                               |                                     |                                                                             |                    |                                                                                               |                     |                                             |                        |                                                           |                |                                                                                   |                     |                                      |
| 1) <i>Representativeness of the sample:</i><br>a) Truly representative of the average in the target population. ★ (all subjects or random sampling)<br>b) Somewhat representative of the average in the target population. ★ (non-random sampling)<br>c) Selected group of users.<br>d) No description of the sampling strategy.                                                                      | 1b ★                                | random sampling but no description of strategy                              | 1c                 | small sample, not clear how selected from Heidelberg study (veg) or research centre (non-veg) | 1d                  | not described                               | 1b ★                   | small sample, but recruited following newspaper ads       | 1c             | chronic dialysis patients                                                         | 1a ★                | -                                    |
| 2) <i>Non-respondents:</i><br>a) Comparability between respondents and non-respondents characteristics is established, and the response rate is satisfactory. ★<br>b) The response rate is unsatisfactory, or the comparability between respondents and non-respondents is unsatisfactory.<br>c) No description of the response rate or the characteristics of the responders and the non-responders. | 2c                                  | No description of those not enrolled                                        | 2c                 | No description of those not enrolled                                                          | 2c                  | No description of those not enrolled        | 2c                     | No description of those not enrolled                      | 2c             | No description of those not enrolled                                              | 2a ★                | -                                    |
| 3) <i>Ascertainment of the exposure (risk factor):</i><br>a) Validated measurement tool. ★<br>b) Non-validated measurement tool, but the tool is available or described.<br>c) No description of the measurement tool.<br>NOTE - Study must say 'validated' to score star                                                                                                                             | 3c                                  | tool not described                                                          | 3c                 | no tool                                                                                       | 3b                  | tool described, but not clear if validated  | 3b                     | tool described, but not clear if validated                | 3c             | tool not described                                                                | 3b                  | tool described, unclear if validated |
| <b>Comparability: (Maximum 2 stars)</b>                                                                                                                                                                                                                                                                                                                                                               |                                     |                                                                             |                    |                                                                                               |                     |                                             |                        |                                                           |                |                                                                                   |                     |                                      |
| 1) <i>The subjects in different outcome groups are comparable, based on the study design or analysis. Confounding factors are controlled.</i><br>a) <i>The study controls for the most important factor (BMI). ★</i><br>b) <i>The study controls for any additional factors. ★ (Smoking and physical activity)</i><br>Note: for ★ on 1b - both PA and smoking needs to be controlled                  | -                                   | smoking controlled for, however BMI sig difference and no description of PA | -                  | did not adjust for confounders (differences in other risk factors between groups)             | 1a ★                | matched by BMI, age, sex - no mention of PA | 1a ★                   | matched by BMI, age, sex. PA sig different between groups | -              | age and sex matched, but BMI still sig different between groups, and not adjusted | -                   | Baseline data not available          |

Supplementary Data

**Supplemental Table 2.** Modified Newcastle Ottawa Scale assessing of the quality of studies - Continued

|                                                                                                                                                                                                                                                                                                                                                                                                                                                                                                                                                                                                     |                    |          |                      |          |                      |          |                      |          |                      |          |                      |          |
|-----------------------------------------------------------------------------------------------------------------------------------------------------------------------------------------------------------------------------------------------------------------------------------------------------------------------------------------------------------------------------------------------------------------------------------------------------------------------------------------------------------------------------------------------------------------------------------------------------|--------------------|----------|----------------------|----------|----------------------|----------|----------------------|----------|----------------------|----------|----------------------|----------|
| <p><b>Outcome:</b> (Maximum 2 stars)<br/> <i>1) Assessment of the outcome:</i><br/>           a) Independent blind assessment. ★<br/>           b) Record linkage. ★<br/>           c) Self report.<br/>           d) No description.<br/> <i>2) Statistical test:</i><br/>           a) The statistical test used to analyse the data is clearly described and appropriate, and the measurement of the association is presented, including confidence intervals and the probability level (p value). ★<br/>           b) The statistical test is not appropriate, not described or incomplete.</p> | <p>1a ★<br/>2b</p> | <p>-</p> | <p>1a ★<br/>2a ★</p> | <p>-</p> |
| <p><b>Total ★ (/7)</b></p>                                                                                                                                                                                                                                                                                                                                                                                                                                                                                                                                                                          | <p>2</p>           |          | <p>2</p>             |          | <p>3</p>             |          | <p>4</p>             |          | <p>2</p>             |          | <p>4</p>             |          |

Supplementary Data

**Supplemental Table 2.** Modified Newcastle Ottawa Scale assessing of the quality of studies - Continued

|                                                                                                                                                                                                                                                                                                                                                                                                       | Pinto et al. (61) | Justification                                      | Pongstaporn et al. (62) | Justification                        | Refsum et al. (63) | Justification                                                                              | Sebekova et al. (64) | Justification                                    | Sebekova et al. (65) | Justification                              | Su et al. (66) | Justification                        |
|-------------------------------------------------------------------------------------------------------------------------------------------------------------------------------------------------------------------------------------------------------------------------------------------------------------------------------------------------------------------------------------------------------|-------------------|----------------------------------------------------|-------------------------|--------------------------------------|--------------------|--------------------------------------------------------------------------------------------|----------------------|--------------------------------------------------|----------------------|--------------------------------------------|----------------|--------------------------------------|
| <b>Sample selection criteria</b><br><b>Selection:</b> (Maximum 3 stars)                                                                                                                                                                                                                                                                                                                               |                   |                                                    |                         |                                      |                    |                                                                                            |                      |                                                  |                      |                                            |                |                                      |
| 1) <i>Representativeness of the sample:</i><br>a) Truly representative of the average in the target population. ★ (all subjects or random sampling)<br>b) Somewhat representative of the average in the target population. ★ (non-random sampling)<br>c) Selected group of users.<br>d) No description of the sampling strategy.                                                                      | 1b ★              | recruited via email, adverts and email circulation | 1d                      | -                                    | 1b ★               | large numbers but obtained from cardiac clinic                                             | 1d                   | -                                                | 1d                   | -                                          | 1c             | small select sample                  |
| 2) <i>Non-respondents:</i><br>a) Comparability between respondents and non-respondents characteristics is established, and the response rate is satisfactory. ★<br>b) The response rate is unsatisfactory, or the comparability between respondents and non-respondents is unsatisfactory.<br>c) No description of the response rate or the characteristics of the responders and the non-responders. | 2c                | no description of those not enrolled               | 2c                      | no description of those not enrolled | 2c                 | no description of those not enrolled                                                       | 2c                   | no description of those not enrolled             | 2c                   | no description of those not enrolled       | 2c             | no description of those not enrolled |
| 3) <i>Ascertainment of the exposure (risk factor):</i><br>a) Validated measurement tool. ★<br>b) Non-validated measurement tool, but the tool is available or described.<br>c) No description of the measurement tool.<br><i>NOTE - Study must say 'validated' to score star</i>                                                                                                                      | 3a ★              | validated FFQ                                      | 3c                      | tool not described                   | 3b                 | tool described, but not clear if validated                                                 | 3b                   | tool described, but not clear if validated       | 3b                   | tool described, but not clear if validated | 3c             | tool not described                   |
| <b>Comparability:</b> (Maximum 2 stars)                                                                                                                                                                                                                                                                                                                                                               |                   |                                                    |                         |                                      |                    |                                                                                            |                      |                                                  |                      |                                            |                |                                      |
| 1) <i>The subjects in different outcome groups are comparable, based on the study design or analysis. Confounding factors are controlled.</i><br>a) <i>The study controls for the most important factor (BMI). ★</i><br>b) <i>The study controls for any additional factors. ★ (Smoking and physical activity)</i><br><i>Note: for ★ on 1b - both PA and smoking needs to be controlled</i>           | 1a ★              | BMI controlled - Nil for PA                        | -                       | -                                    | -                  | does not control for confounders, unclear if potential confounders differed between groups | -                    | BMI sig different. Smoking controlled but not PA | -                    | does not control for confounders           | 1a ★           | BMI not sig diff                     |



Supplementary Data

**Supplemental Table 2.** Modified Newcastle Ottawa Scale assessing of the quality of studies - Continued

|                                                                                                                                                                                                                                                                                                                                                                                                                                                                                                                                                         |                         |          |                         |          |                         |          |                         |          |                         |          |                         |          |
|---------------------------------------------------------------------------------------------------------------------------------------------------------------------------------------------------------------------------------------------------------------------------------------------------------------------------------------------------------------------------------------------------------------------------------------------------------------------------------------------------------------------------------------------------------|-------------------------|----------|-------------------------|----------|-------------------------|----------|-------------------------|----------|-------------------------|----------|-------------------------|----------|
| <p><b>Outcome:</b> (Maximum 2 stars)</p> <p>1) <i>Assessment of the outcome:</i></p> <p>a) Independent blind assessment. ★</p> <p>b) Record linkage. ★</p> <p>c) Self report.</p> <p>d) No description.</p> <p>2) <i>Statistical test:</i></p> <p>a) The statistical test used to analyse the data is clearly described and appropriate, and the measurement of the association is presented, including confidence intervals and the probability level (p value). ★</p> <p>b) The statistical test is not appropriate, not described or incomplete.</p> | <p>1a ★</p> <p>2a ★</p> | <p>-</p> |
| <p><b>Total ★ (/7)</b></p>                                                                                                                                                                                                                                                                                                                                                                                                                                                                                                                              | <p>5</p>                |          | <p>2</p>                |          | <p>3</p>                |          | <p>2</p>                |          | <p>2</p>                |          | <p>3</p>                |          |

Supplementary Data

**Supplemental Table 2.** Modified Newcastle Ottawa Scale assessing of the quality of studies - Continued

|                                                                                                                                                                                                                                                                                                                                                                                                       | Suwannuruks et al. (67) | Justification                        | Szeto et al. (68) | Justification                        | Tungtrongchitr et al. (69) | Justification                                         | Wu et al. (70) | Justification                              | Yang et al. (71) | Justification                              |
|-------------------------------------------------------------------------------------------------------------------------------------------------------------------------------------------------------------------------------------------------------------------------------------------------------------------------------------------------------------------------------------------------------|-------------------------|--------------------------------------|-------------------|--------------------------------------|----------------------------|-------------------------------------------------------|----------------|--------------------------------------------|------------------|--------------------------------------------|
| <b>Sample selection criteria</b><br><b>Selection:</b> (Maximum 3 stars)                                                                                                                                                                                                                                                                                                                               |                         |                                      |                   |                                      |                            |                                                       |                |                                            |                  |                                            |
| <i>1) Representativeness of the sample:</i><br>a) Truly representative of the average in the target population. ★ (all subjects or random sampling)<br>b) Somewhat representative of the average in the target population. ★ (non-random sampling)<br>c) Selected group of users.<br>d) No description of the sampling strategy.                                                                      | 1c                      | small select sample                  | 1c                | small select sample                  | 1c                         | small select sample, not clear how controls recruited | 1b ★           | patients on HD                             | 1c               | select sample, not representative          |
| <i>2) Non-respondents:</i><br>a) Comparability between respondents and non-respondents characteristics is established, and the response rate is satisfactory. ★<br>b) The response rate is unsatisfactory, or the comparability between respondents and non-respondents is unsatisfactory.<br>c) No description of the response rate or the characteristics of the responders and the non-responders. | 2c                      | no description of those not enrolled | 2c                | no description of those not enrolled | 2c                         | no description of those not enrolled                  | 2a ★           | -                                          | 2c               | no description of those not enrolled       |
| <i>3) Ascertainment of the exposure (risk factor):</i><br>a) Validated measurement tool. ★<br>b) Non-validated measurement tool, but the tool is available or described.<br>c) No description of the measurement tool.<br><i>NOTE - Study must say 'validated' to score star</i>                                                                                                                      | 3c                      | tool not described                   | 3c                | tool not described                   | 3c                         | tool not described                                    | 3b             | tool described, but not clear if validated | 3b               | tool described, but not clear if validated |

Supplementary Data

**Supplemental Table 2.** Modified Newcastle Ottawa Scale assessing of the quality of studies - Continued

|                                                                                                                                                                                                                                                                                                                                                                                                                                                                                                  |            |                              |              |   |              |   |              |                                                 |              |                                                   |
|--------------------------------------------------------------------------------------------------------------------------------------------------------------------------------------------------------------------------------------------------------------------------------------------------------------------------------------------------------------------------------------------------------------------------------------------------------------------------------------------------|------------|------------------------------|--------------|---|--------------|---|--------------|-------------------------------------------------|--------------|---------------------------------------------------|
| <p><b>Comparability:</b> (Maximum 2 stars)</p> <p>1) The subjects in different outcome groups are comparable, based on the study design or analysis. Confounding factors are controlled.</p> <p>a) The study controls for the most important factor (BMI). ★</p> <p>b) The study controls for any additional factors. ★ (Smoking and physical activity)</p> <p>Note: for ★ on 1b - both PA and smoking needs to be controlled</p>                                                                | -          | not adjusted for confounders | -            | - | -            | - | -            | some differences between groups, did not adjust | 1a ★<br>2a ★ | Table 1 footnotes suggest adjusted for covariates |
| <p><b>Outcome:</b> (Maximum 2 stars)</p>                                                                                                                                                                                                                                                                                                                                                                                                                                                         |            |                              |              |   |              |   |              |                                                 |              |                                                   |
| <p>1) Assessment of the outcome:</p> <p>a) Independent blind assessment. ★</p> <p>b) Record linkage. ★</p> <p>c) Self report.</p> <p>d) No description.</p> <p>2) Statistical test:</p> <p>a) The statistical test used to analyse the data is clearly described and appropriate, and the measurement of the association is presented, including confidence intervals and the probability level (p value). ★</p> <p>b) The statistical test is not appropriate, not described or incomplete.</p> | 1a ★<br>2b | stats test not described     | 1a ★<br>2a ★ | - | 1a ★<br>2a ★ | - | 1a ★<br>2a ★ | -                                               | 1a ★<br>2a ★ | -                                                 |
| <p>★Total = /7</p>                                                                                                                                                                                                                                                                                                                                                                                                                                                                               | 1          |                              | 2            |   | 2            |   | 4            |                                                 | 4            |                                                   |

BMI, body mass index; diff, difference; FFQ, food frequency questionnaire; FR, food record; HD, hemodialysis; NV, Non-vegetarian; PA, physical activity; Pts, patients; sig, significant; ve, vegan; veg, vegetarian; WFR, weighted food record.

<sup>1</sup> Two separate papers identified reporting on same study participants, with different outcome marker/s

<sup>2</sup> Studies assessed using the modified Newcastle Ottawa Scale can achieve 7 stars in total. Studies attracting 7 stars are of high quality while studies attracting 0 stars are of low quality. The criteria in the first column explains the criteria to attain a star.

★, Sample selection criteria met

## Supplementary Data

**Supplemental Table 3:** GRADE assessment of the quality of the body of evidence in observational studies for each outcome

| Quality assessment |                       |                      |                          |              |             |                      | № of patients    |         | Effect            |                                                       | Quality          | Importance |
|--------------------|-----------------------|----------------------|--------------------------|--------------|-------------|----------------------|------------------|---------|-------------------|-------------------------------------------------------|------------------|------------|
| № of studies       | Study design          | Risk of bias         | Inconsistency            | Indirectness | Imprecision | Other considerations | Vegetarian-based | control | Relative (95% CI) | Absolute (95% CI)                                     |                  |            |
| CRP                |                       |                      |                          |              |             |                      |                  |         |                   |                                                       |                  |            |
| 19                 | Observational studies | serious <sup>a</sup> | serious <sup>b</sup>     | not serious  | not serious | None <sup>3</sup>    | 1844             | 4736    | -                 | MD <b>0.62 lower</b><br>(0.93 lower to 0.30 lower)    | ⊕○○○<br>VERY LOW | IMPORTANT  |
| Fibrinogen         |                       |                      |                          |              |             |                      |                  |         |                   |                                                       |                  |            |
| 3                  | Observational studies | serious <sup>1</sup> | not serious <sup>4</sup> | not serious  | serious     | none <sup>3</sup>    | 112              | 96      | -                 | MD <b>0.22 lower</b><br>(0.41 lower to 0.04 lower)    | ⊕○○○<br>VERY LOW | IMPORTANT  |
| Thrombocytes       |                       |                      |                          |              |             |                      |                  |         |                   |                                                       |                  |            |
| 7                  | Observational studies | serious <sup>1</sup> | not serious <sup>4</sup> | not serious  | not serious | none                 | 663              | 507     | -                 | MD <b>8.24 higher</b><br>(3.35 lower to 19.82 higher) | ⊕○○○<br>VERY LOW | IMPORTANT  |
| Leukocytes         |                       |                      |                          |              |             |                      |                  |         |                   |                                                       |                  |            |

## Supplementary Data

| Quality assessment        |                       |                      |                      |                          |             |                      | N <sup>o</sup> of patients |         | Effect            |                                                    | Quality          | Importance |
|---------------------------|-----------------------|----------------------|----------------------|--------------------------|-------------|----------------------|----------------------------|---------|-------------------|----------------------------------------------------|------------------|------------|
| N <sup>o</sup> of studies | Study design          | Risk of bias         | Inconsistency        | Indirectness             | Imprecision | Other considerations | Vegetarian-based           | control | Relative (95% CI) | Absolute (95% CI)                                  |                  |            |
| 11                        | Observational studies | serious <sup>1</sup> | serious <sup>2</sup> | not serious <sup>3</sup> | not serious | none                 | 944                        | 970     | -                 | MD <b>0.62 lower</b><br>(1.13 lower to 0.10 lower) | ⊕○○○<br>VERY LOW | IMPORTANT  |

CI, Confidence interval; MD, Mean difference

<sup>1</sup> The studies were viewed as being in the category of 'serious limitation'. This category was selected as the risk of bias assessments for each study using a modified Newcastle Ottawa Scale resulted in many studies scoring poorly (majority 4 or less /7). In accordance with the GRADE guidelines, 'high risk' needed to be categorized as either 'serious limitations' or 'very serious limitations'. In view of the potential implications of the 'high risk' aspects on the quality of the body of evidence, 'serious limitations' was selected.

<sup>2</sup> I squared value of 100%, indicating considerable heterogeneity

<sup>3</sup> Funnel plot does not indicate publication bias

<sup>4</sup> I squared value of <50% indicating minimal heterogeneity

**Supplemental Figure 1 A-B.** Funnel plot and Risk of bias

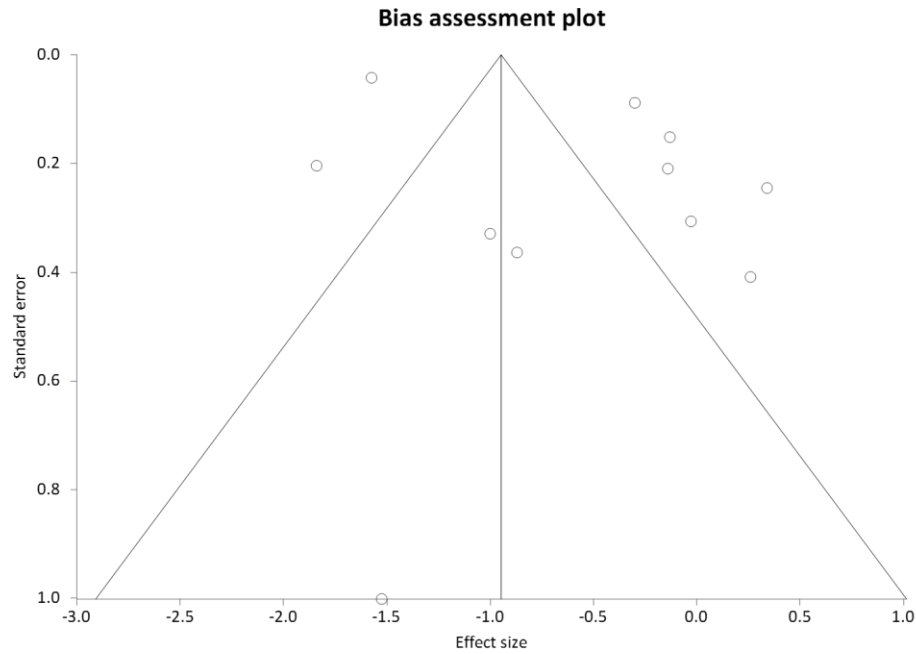

**Supplemental Figure 1A.** Bias assessment plot for leukocyte concentration with Egger's test applied. Egger bias 4.439487; 95% CI: -0.439381, 9.318356;  $P = 0.0697$

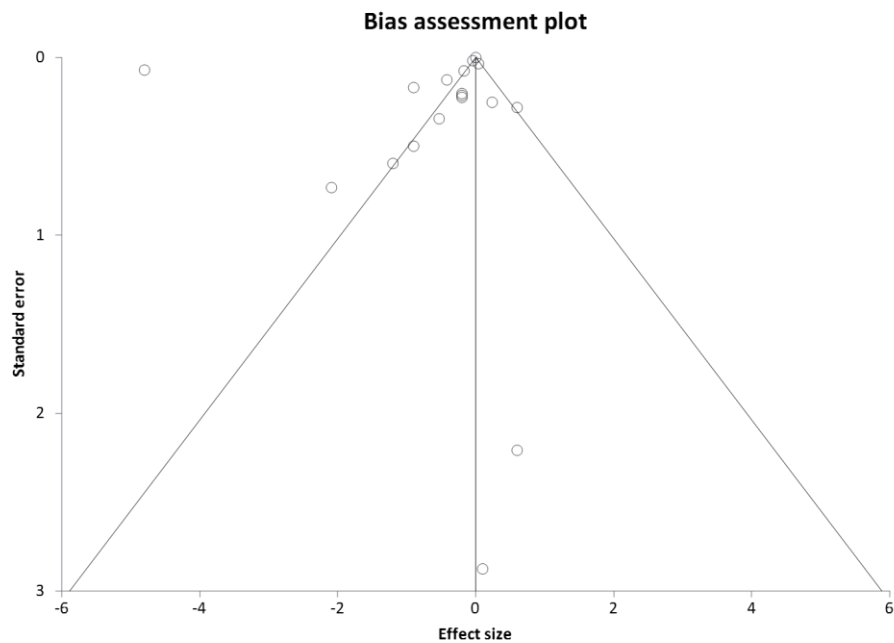

**Supplemental Figure 1B.** Bias assessment plot for CRP concentration with Egger's test applied. Egger bias: -5.165008; 95% CI: -13.583609, 3.253593;  $P = 0.2118$

**Supplemental Figure 2 A-B.** Sensitivity analysis based on individual study weightings

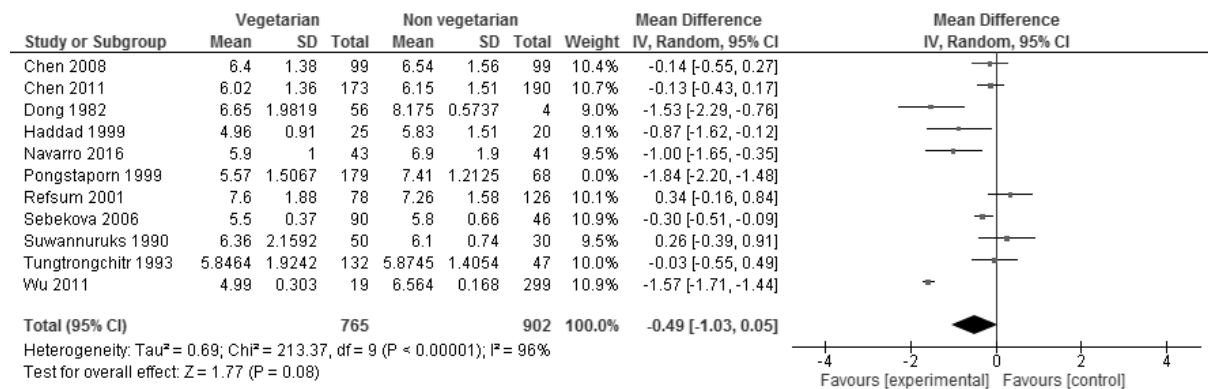

**Supplemental figure 2A.** Sensitivity analysis for leukocyte ( $10^3/\mu\text{L}$ ) values between those following vegetarian-based dietary patterns and non-vegetarian dietary patterns (cross-sectional studies) with Pongstaporn et al omitted. Diamond indicates weighted mean difference with 95% confidence intervals.

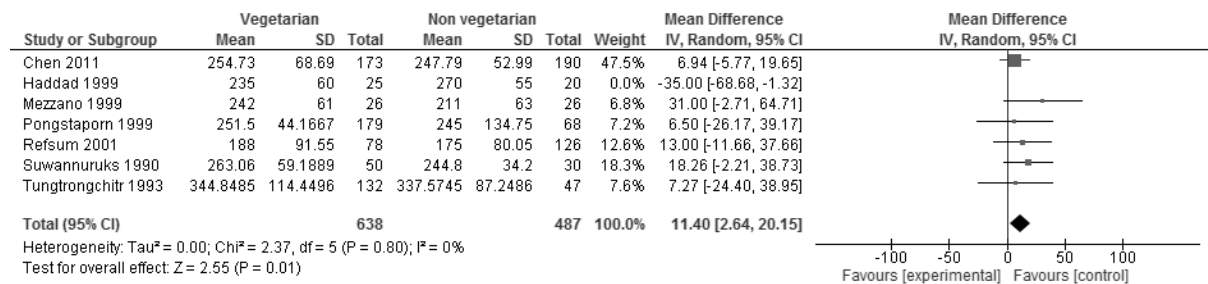

**Supplemental figure 2B.** Sensitivity analysis for thrombocyte ( $\times 10^9/\text{L}$ ) counts between those following vegetarian-based dietary patterns and non-vegetarian dietary patterns (cross-sectional studies) with Haddad et al omitted. Diamond indicates weighted mean difference with 95% confidence intervals.

**Supplemental Figure 3 A-B.** Sensitivity analysis based on participant's co-morbidities.

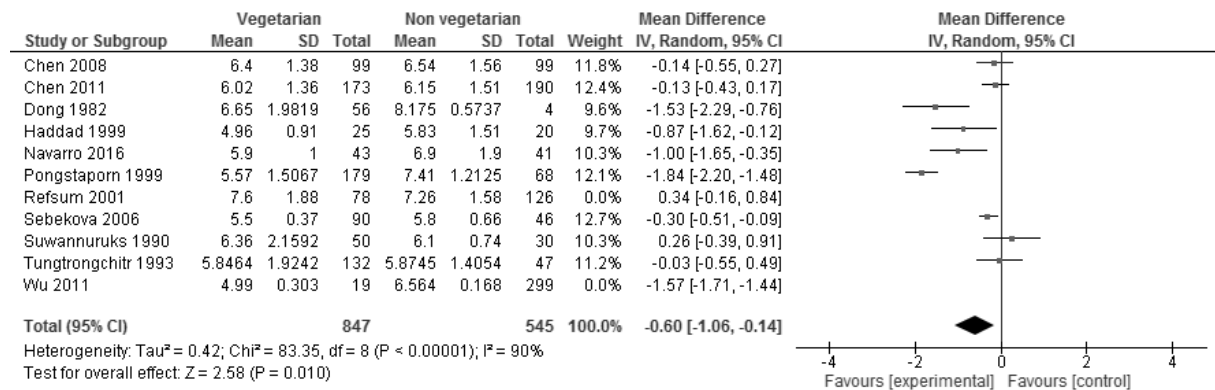

**Supplemental figure 3A.** Sensitivity analysis for leukocytes ( $10^3/\mu\text{L}$ ) between those following vegetarian-based and non-vegetarian based dietary patterns (cross-sectional studies) with studies omitted where participants were receiving haemodialysis treatment, CVD and/or T2DM were omitted. Diamond indicates weighted mean difference with 95% confidence intervals.

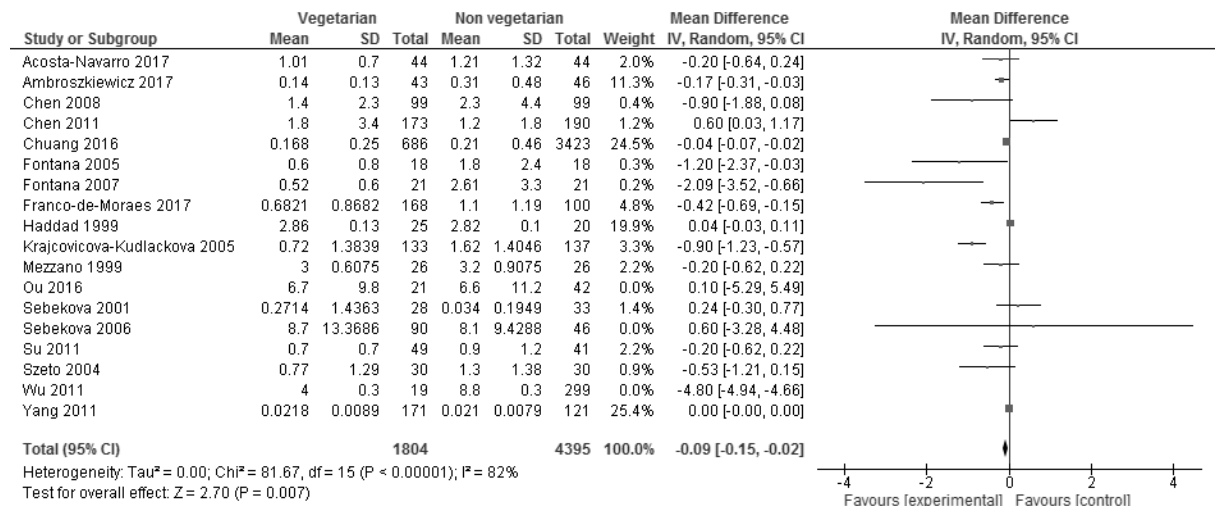

**Supplemental figure 3B.** Sensitivity analysis for CRP (mg/L) between those following vegetarian-based and non-vegetarian based dietary patterns (cross-sectional studies) with studies omitted where participants were receiving haemodialysis treatment, CVD and/or T2DM were omitted. Diamond indicates weighted mean difference with 95% confidence intervals.



**Supplemental Figure 4 A-B.** Sub-group analyses based on diet type

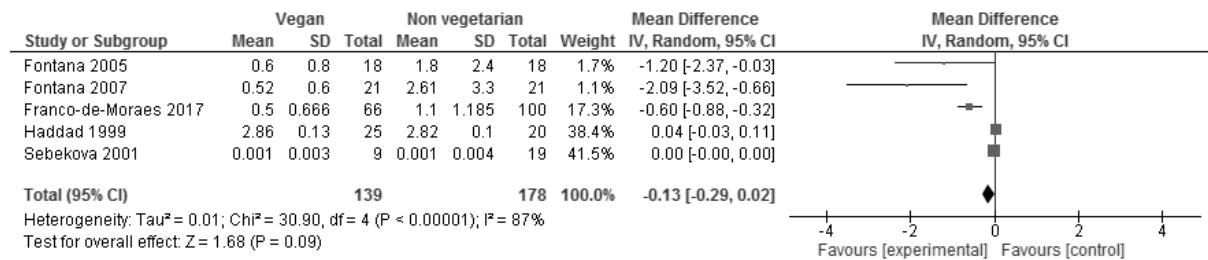

**Supplemental Figure 4A.** Difference in CRP (mg/L) values between those following vegan dietary patterns and non-vegetarian dietary patterns (cross-sectional studies). Diamond indicates weighted mean difference with 95% confidence intervals

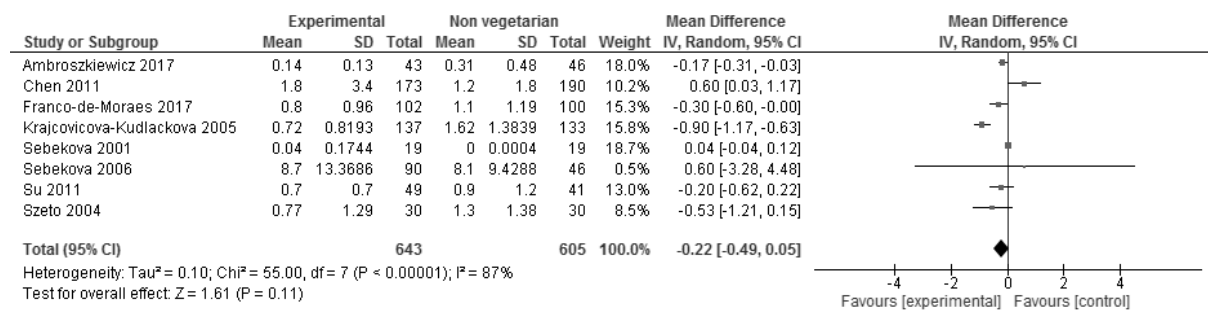

**Supplemental Figure 4B.** Difference in CRP (mg/L) values between those following Lacto-ovo-vegetarian dietary patterns and non-vegetarian dietary patterns (cross-sectional studies). Diamond indicates weighted mean difference with 95% confidence interval.

Supplementary Data

| Quality assessment |                   |                      |                      |                      |                      |                      | № of patients   |                           | Effect            |                                           | Quality         | Importance |
|--------------------|-------------------|----------------------|----------------------|----------------------|----------------------|----------------------|-----------------|---------------------------|-------------------|-------------------------------------------|-----------------|------------|
| № of studies       | Study design      | Risk of bias         | Inconsistency        | Indirectness         | Imprecision          | Other considerations | Vegetarian Diet | Mixed non-vegetarian diet | Relative (95% CI) | Absolute (95% CI)                         |                 |            |
| CRP                |                   |                      |                      |                      |                      |                      |                 |                           |                   |                                           |                 |            |
| 4                  | randomized trials | serious <sup>1</sup> | serious <sup>2</sup> | serious <sup>3</sup> | serious <sup>4</sup> | nil                  | 114             | 116                       | -                 | MD 1.07 lower (2.75 lower to 0.61 higher) | ⊕○○<br>VERY LOW | IMPORTANT  |

MD – mean difference,

<sup>1</sup> The studies were viewed as bring in the category of 'serious'. This category was selected as despite risk of bias assessments for each study mainly compromising of 'low risk' and 'unclear risk' (see risk of bias assessment charts) the 'other bias's domain had 100% of studies in the 'high risk category'. In accordance with the GRADE guidelines, 'high risk' should be downgraded by one level when "one criterion or some limitations for multiple criteria, sufficient to lower confidence in the estimate of effect" was selected.

<sup>2</sup> Inconsistency was deemed to be 'not serious' as the I squared value of 53%, which only slightly exceeded the range (50%-75%) which "likely indicates substantial heterogeneity" as outlined in the Cochrane handbook.

<sup>3</sup> The studies were viewed as bring in the category of 'serious'. This category was selected, as there was considerable inconsistency between the populations regarding the main review question. For example, Elkan et al, 2008 study examined participants with rheumatoid arthritis, Kahleova et al, had patients had T2DM and Macknin et al, 2015 had participants who were children with a BMI > 95th % for age/sex + cholesterol >169mg/dL.

<sup>4</sup> 95% CI does not include an effect, 95% CI does not include appreciable benefit or harm, however less than 400 participants available, therefore the decision was made to downgrade the quality of evidence.

**Supplemental Figure 5.** GRADE assessment of the quality of the body of evidence – CRP intervention studies

## Supplementary Data

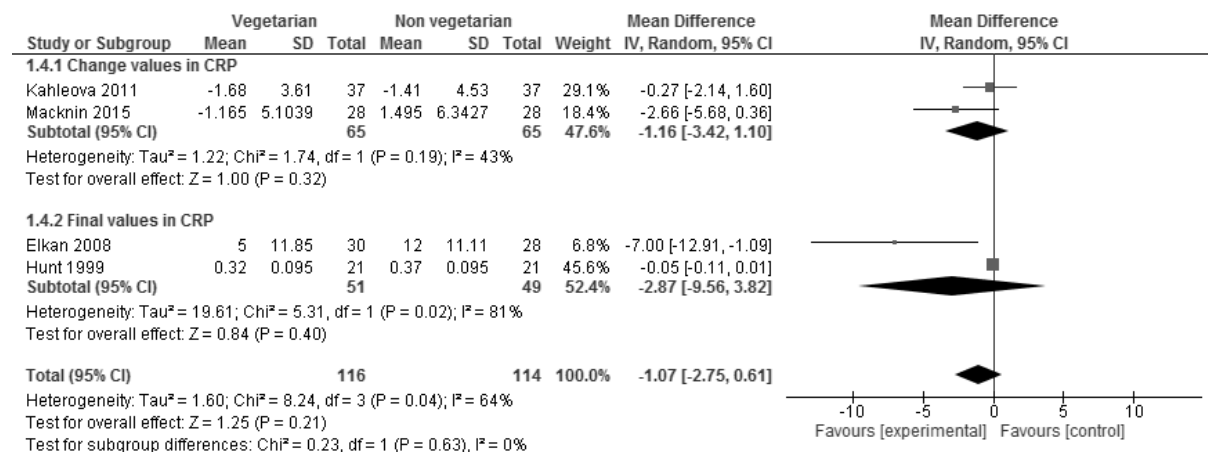

**Supplemental Figure 6.** Change in C-reactive protein (mg/L) between vegetarian dietary patterns and non-vegetarian control dietary patterns (presented as sub-groups based on mean final or change values for readability). Diamond indicates weighted mean difference with 95% confidence intervals.

**Supplemental Table 4.** Cochrane risk of bias assessment of interventional studies

| <b>Elkan et al. (72)</b>                                    |                          |                                                                                                                                    |
|-------------------------------------------------------------|--------------------------|------------------------------------------------------------------------------------------------------------------------------------|
| <b>Bias</b>                                                 | <b>Authors' judgment</b> | <b>Support for judgment</b>                                                                                                        |
| Random sequence generation (selection bias)                 | Unclear risk             | "Participants were randomly assigned using a minimization technique" - no specific detail on how this was performed.               |
| Allocation concealment (selection bias)                     | Unclear risk             | Not Specified                                                                                                                      |
| Blinding of participants and researchers (performance bias) | High risk                | Participants aware of dietary group after first check-up (3 months into 1-year trial) - No description of blinding by researchers. |
| Blinding of outcome assessment (detection bias)             | Low risk                 | Not stated - although outcomes unlikely to be influenced by blinding (blood bio-markers)                                           |
| Incomplete outcome data (attrition bias)                    | High Risk                | Dropout rate >25% in vegan group after 1 year. Intention-to-treat (ITT) not used                                                   |
| Selective reporting (reporting bias)                        | Unclear risk             | Protocol not available                                                                                                             |
| Other bias                                                  | High Risk                | CRP appears significantly higher in control group at baseline.                                                                     |
| <b>Kahleova et al. (73)</b>                                 |                          |                                                                                                                                    |
| <b>Bias</b>                                                 | <b>Authors' judgment</b> | <b>Support for judgment</b>                                                                                                        |
| Random sequence generation (selection bias)                 | Unclear risk             | Stated to be randomized, no details of randomisation method given                                                                  |
| Allocation concealment (selection bias)                     | Unclear risk             | Not stated                                                                                                                         |
| Blinding of participants and researchers (performance bias) | Unclear risk             | Not possible to blind personnel, unclear if patients blinded                                                                       |
| Blinding of outcome assessment (detection bias)             | Low risk                 | Not stated - although outcomes unlikely to be influenced by blinding (blood bio-markers)                                           |
| Incomplete outcome data (attrition bias)                    | Low risk                 | 16% drop out, but similar between groups and ITT used                                                                              |
| Selective reporting (reporting bias)                        | Unclear risk             | Protocol available, but insufficient information to determine if all outcomes reported                                             |
| Other bias                                                  | High risk                | Smoking higher in Control group at baseline                                                                                        |
| <b>Hunt &amp; Roughead. (81)</b>                            |                          |                                                                                                                                    |
| <b>Bias</b>                                                 | <b>Authors' judgment</b> | <b>Support for judgment</b>                                                                                                        |
| Random sequence generation (selection bias)                 | Unclear risk             | Stated to be randomized, no details of randomisation method given                                                                  |
| Allocation concealment (selection bias)                     | Unclear Risk             | Not stated                                                                                                                         |

**Supplemental Table 4 – Continued**

|                                                             |                          |                                                                                                                                                     |
|-------------------------------------------------------------|--------------------------|-----------------------------------------------------------------------------------------------------------------------------------------------------|
| Blinding of participants and researchers (performance bias) | High Risk                | Not possible to blind researchers. Not possible to blind participants (cross-over) which may have affected performance in different arms            |
| Blinding of outcome assessment (detection bias)             | Low risk                 | Not stated - although outcomes unlikely to be influenced by blinding (blood bio-markers)                                                            |
| Incomplete outcome data (attrition bias)                    | Low risk                 | Nil drop out                                                                                                                                        |
| Selective reporting (reporting bias)                        | Unclear risk             | Protocol not available                                                                                                                              |
| Other bias                                                  | High Risk                | Nil washout period                                                                                                                                  |
| <b>Kjeldsen-Kragh et al. (74, 75) <sup>1</sup></b>          |                          |                                                                                                                                                     |
| <b>Bias</b>                                                 | <b>Authors' judgment</b> | <b>Support for judgment</b>                                                                                                                         |
| Random sequence generation (selection bias)                 | Unclear Risk             | Stated to be randomized, no details of randomisation method given                                                                                   |
| Allocation concealment (selection bias)                     | Unclear Risk             | Not stated                                                                                                                                          |
| Blinding of participants and researchers (performance bias) | High risk                | Single blind trial - Participants aware of dietary group after first check-up (3 months into 1-year trial).                                         |
| Blinding of outcome assessment (detection bias)             | Low risk                 | Clinicians/GP's blinded + outcomes unlikely to be influenced by blinding (blood bio-markers)                                                        |
| Incomplete outcome data (attrition bias)                    | High risk                | 30% drop out (even though ITT used and similar between groups)                                                                                      |
| Selective reporting (reporting bias)                        | Unclear Risk             | The study protocol is not available                                                                                                                 |
| Other bias                                                  | High Risk                | Insufficient baseline data reported to determine differences between groups + substantial difference in kJ intake between interventions and control |
| <b>Macknin et al. (76)</b>                                  |                          |                                                                                                                                                     |
| <b>Bias</b>                                                 | <b>Authors' judgment</b> | <b>Support for judgment</b>                                                                                                                         |
| Random sequence generation (selection bias)                 | Low Risk                 | Randomized using an SAS computer program 1:1 in blocks of 4 families stratified by the child's age group (age strata 9-13 years vs 14-18 years)     |
| Allocation concealment (selection bias)                     | Unclear risk             | Not stated                                                                                                                                          |
| Blinding of participants and researchers (performance bias) | Unclear risk             | Not stated                                                                                                                                          |
| Blinding of outcome assessment (detection bias)             | Low risk                 | Not stated - although outcomes unlikely to be influenced by blinding (blood bio-markers)                                                            |
| Incomplete outcome data (attrition bias)                    | High Risk                | >10% drop out, both in intervention group, no ITT                                                                                                   |
| Selective reporting (reporting bias)                        | Low Risk                 | The study protocol is available and all pre-specified outcomes of interest to the review have been reported in the pre specified way                |
| Other bias                                                  | High Risk                | Baseline CRP and IL-6 does not appear to be similar.                                                                                                |
| <b>Nenonen et al. (77)</b>                                  |                          |                                                                                                                                                     |
| <b>Bias</b>                                                 | <b>Authors' judgment</b> | <b>Support for judgment</b>                                                                                                                         |

**Supplemental Table 4 – Continued**

|                                                             |                          |                                                                                                                                                                                                               |
|-------------------------------------------------------------|--------------------------|---------------------------------------------------------------------------------------------------------------------------------------------------------------------------------------------------------------|
| Random sequence generation (selection bias)                 | Unclear risk             | Stated to be randomized, no details of randomisation method given                                                                                                                                             |
| Allocation concealment (selection bias)                     | Unclear risk             | Not stated                                                                                                                                                                                                    |
| Blinding of participants and researchers (performance bias) | Unclear risk             | Not stated                                                                                                                                                                                                    |
| Blinding of outcome assessment (detection bias)             | Low risk                 | Not stated - although outcomes unlikely to be influenced by blinding (blood bio-markers)                                                                                                                      |
| Incomplete outcome data (attrition bias)                    | High risk                | higher drop out in intervention, related to intervention                                                                                                                                                      |
| Selective reporting (reporting bias)                        | Unclear risk             | Protocol not available                                                                                                                                                                                        |
| Other bias                                                  | Unclear risk             | Baseline CRP between groups unclear                                                                                                                                                                           |
| <b>Richter et al (78)</b>                                   |                          |                                                                                                                                                                                                               |
| <b>Bias</b>                                                 | <b>Authors' judgment</b> | <b>Support for judgment</b>                                                                                                                                                                                   |
| Random sequence generation (selection bias)                 | Unclear Risk             | Not stated                                                                                                                                                                                                    |
| Allocation concealment (selection bias)                     | Unclear Risk             | Not stated                                                                                                                                                                                                    |
| Blinding of participants and researchers (performance bias) | High risk                | Would not be possible to blind participants or personnel as food was provided. Whilst this may not have affected measures, it may have affected participant behaviour during intervention and control periods |
| Blinding of outcome assessment (detection bias)             | Low risk                 | Not stated - although outcomes unlikely to be influenced by blinding (blood bio-markers)                                                                                                                      |
| Incomplete outcome data (attrition bias)                    | Low risk                 | No missing outcome data                                                                                                                                                                                       |
| Selective reporting (reporting bias)                        | Unclear Risk             | The study protocol not available                                                                                                                                                                              |
| Other bias                                                  | Low risk                 | 4-week washout period,                                                                                                                                                                                        |
| <b>Sköldstam et al. (80)</b>                                |                          |                                                                                                                                                                                                               |
| <b>Bias</b>                                                 | <b>Authors' judgment</b> | <b>Support for judgment</b>                                                                                                                                                                                   |
| Random sequence generation (selection bias)                 | Unclear Risk             | Not stated                                                                                                                                                                                                    |
| Allocation concealment (selection bias)                     | Unclear Risk             | Not stated                                                                                                                                                                                                    |
| Blinding of participants and researchers (performance bias) | Unclear Risk             | Not stated                                                                                                                                                                                                    |
| Blinding of outcome assessment (detection bias)             | Low Risk                 | Not stated - although outcomes unlikely to be influenced by blinding (blood bio-markers)                                                                                                                      |
| Incomplete outcome data (attrition bias)                    | Low risk                 | <5% drop out rate                                                                                                                                                                                             |

Supplementary Data

**Supplemental Table 4 - Continued**

|                                      |              |                                             |
|--------------------------------------|--------------|---------------------------------------------|
| Selective reporting (reporting bias) | Unclear risk | Protocol not described                      |
| Other bias                           | High Risk    | Some bio-markers not comparable at baseline |

---

**Sköldstam (79)**

---

| <b>Bias</b>                                                 | <b>Authors' judgment</b> | <b>Support for judgment</b>                                                                                                            |
|-------------------------------------------------------------|--------------------------|----------------------------------------------------------------------------------------------------------------------------------------|
| Random sequence generation (selection bias)                 | Unclear                  | Not stated                                                                                                                             |
| Allocation concealment (selection bias)                     | Unclear Risk             | Not stated                                                                                                                             |
| Blinding of participants and researchers (performance bias) | high risk                | Not possible to blind researchers. Not possible to blind participants (pre-post) which may have affected performance in different arms |
| Blinding of outcome assessment (detection bias)             | Low Risk                 | Not stated - although outcomes unlikely to be influenced by blinding (blood bio-markers)                                               |
| Incomplete outcome data (attrition bias)                    | unclear risk             | <10%, but unclear at which time pts dropped out                                                                                        |
| Selective reporting (reporting bias)                        | Unclear Risk             | Protocol not described                                                                                                                 |
| Other bias                                                  | Unclear Risk             | Base line data not reported                                                                                                            |

CRP, C-Reactive Protein; ITT, intention to treat; SAS, Statistical Analysis System.

<sup>1</sup> Kjeldsen-Kragh et al 1995 and 1991 - same participants/study, different outcomes reported

Supplementary Data

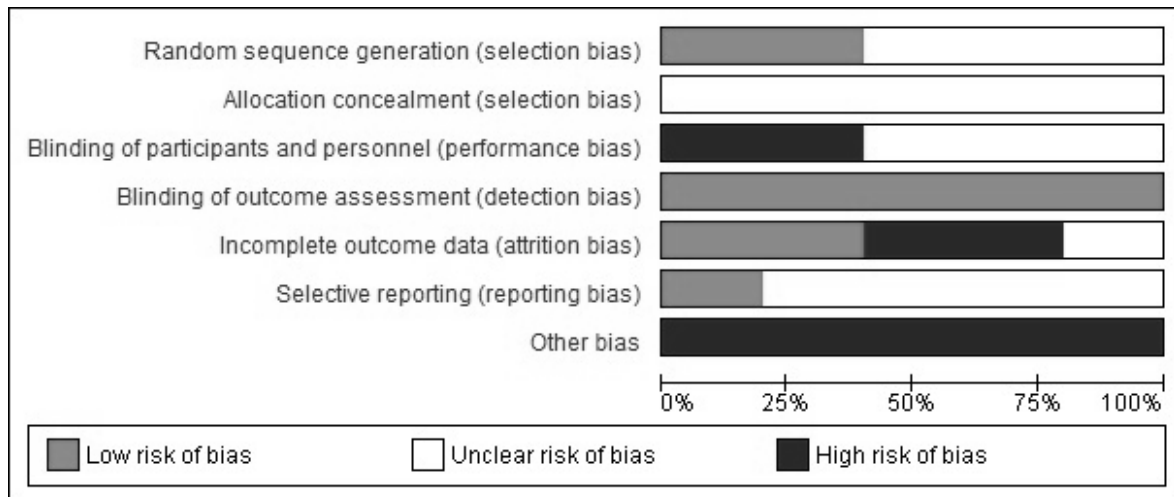

**Supplemental Figure 7.** Risk of bias graph: review authors' judgments about each risk of bias item presented as percentages across all included studies.
